# Supplementary material
Source: PubMed Central journal article supplement (PMC5123554)
Supplement: supp_WNL.0000000000003354_Supplemental-Files.pdf [file supp_WNL.0000000000003354_Supplemental-Files.pdf]

**Figure e1:** Let7i microRNA expressed in leukocytes of patients with ischemic stroke (n=106) compared to controls (n=106) divided by time after stroke onset. Let7i was significantly lower in ischemic stroke compared to controls (p=0.00001). Participants acquired within the first 24 hours of stroke onset (fold change -1.52) and continued to be decreased from 24-48hrs (fold change -1.72) and 48-72 hours (fold change -1.79). While a trend of let7i to decrease over time was present this did not reach statistical significance.

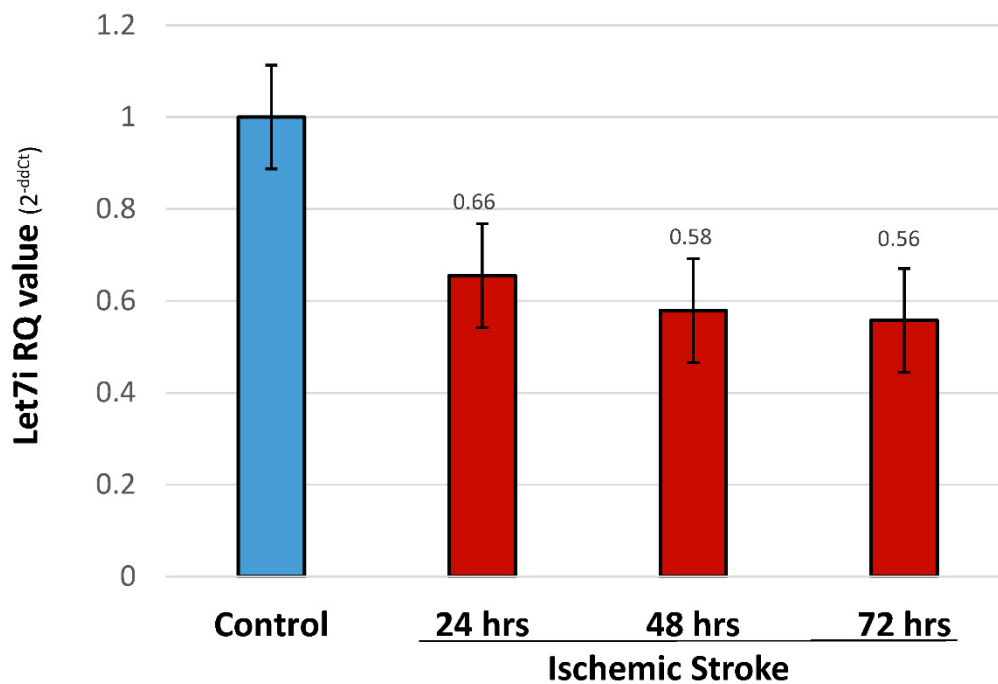

**Table e1:** Gene targets of let7i that inversely correlate with let7i expression in leukocytes of patients with acute ischemic stroke. Targets are predicted with a cumulative weighted context++ score <-0.2 (TargetScan 7.0).

| Gene Symbol | r     | p-value (corr) | Total context++ score |
|-------------|-------|----------------|-----------------------|
| ACER3       | -0.25 | 2.28E-02       | -0.27                 |
| ACTR10      | -0.65 | 1.98E-11       | -0.4                  |
| ACVR2A      | -0.29 | 8.48E-03       | -0.62                 |
| ANAPC13     | -0.45 | 2.10E-05       | -0.39                 |
| ANAPC15     | -0.58 | 5.36E-09       | -0.26                 |
| ANKRA2      | -0.64 | 8.31E-11       | -0.37                 |
| ANKRD49     | -0.74 | 5.18E-16       | -0.74                 |
| AP5M1       | -0.60 | 2.02E-09       | -0.38                 |
| AP5M1       | -0.60 | 2.14E-09       | -0.38                 |
| ARL5A       | -0.57 | 1.89E-08       | -0.36                 |
| ARL5B       | -0.50 | 1.70E-06       | -0.26                 |
| ARL6IP6     | -0.58 | 8.67E-09       | -0.55                 |
| ARL6IP6     | -0.49 | 2.19E-06       | -0.55                 |
| ARL8B       | -0.55 | 6.86E-08       | -0.21                 |
| ARMC10      | -0.59 | 4.19E-09       | -0.26                 |
| ARPP19      | -0.28 | 9.71E-03       | -0.56                 |
| ATG12       | -0.67 | 3.93E-12       | -0.42                 |
| ATG12       | -0.64 | 4.55E-11       | -0.42                 |
| ATP5G3      | -0.58 | 9.03E-09       | -0.3                  |
| ATP6V1C1    | -0.35 | 1.30E-03       | -0.38                 |
| ATP6V1G1    | -0.73 | 1.86E-15       | -0.34                 |
| ATP8B4      | -0.32 | 3.06E-03       | -0.38                 |
| AURKA       | -0.24 | 3.07E-02       | -0.27                 |
| BCAP29      | -0.52 | 5.22E-07       | -0.41                 |
| BCAP29      | -0.50 | 1.29E-06       | -0.41                 |
| BCAS2       | -0.64 | 6.37E-11       | -0.21                 |
| BLOC1S6     | -0.51 | 7.88E-07       | -0.34                 |
| BMPRI1A     | -0.30 | 4.94E-03       | -0.21                 |
| BORA        | -0.58 | 1.00E-08       | -0.21                 |
| BTF3L4      | -0.69 | 3.03E-13       | -0.41                 |
| BZW1        | -0.48 | 4.48E-06       | -0.76                 |
| BZW1        | -0.35 | 1.15E-03       | -0.76                 |
| C11orf57    | -0.70 | 1.22E-13       | -0.43                 |
| C11orf58    | -0.60 | 1.61E-09       | -0.3                  |
| C12orf4     | -0.63 | 9.70E-11       | -0.26                 |
| C14orf2     | -0.77 | 1.36E-17       | -0.6                  |
| C14orf28    | -0.53 | 2.78E-07       | -1.63                 |
| C18orf21    | -0.64 | 4.02E-11       | -0.72                 |
| C1GALT1     | -0.38 | 3.28E-04       | -0.38                 |
| C3orf38     | -0.61 | 7.53E-10       | -0.42                 |
| C4orf29     | -0.58 | 9.87E-09       | -0.41                 |
| C4orf33     | -0.46 | 8.52E-06       | -0.3                  |
| C6orf120    | -0.72 | 1.50E-14       | -0.29                 |
| C6orf211    | -0.67 | 3.06E-12       | -0.3                  |
| C7orf60     | -0.41 | 1.18E-04       | -0.23                 |
| C9orf156    | -0.56 | 2.34E-08       | -0.22                 |
| C9orf85     | -0.58 | 5.49E-09       | -0.24                 |
| CASP3       | -0.62 | 4.13E-10       | -0.52                 |
| CCDC71L     | -0.43 | 4.00E-05       | -0.46                 |
| CCNT2       | -0.63 | 1.76E-10       | -0.32                 |
| CCNT2       | -0.60 | 1.21E-09       | -0.32                 |
| CD164       | -0.66 | 9.46E-12       | -0.34                 |
| CD28        | -0.34 | 1.57E-03       | -0.22                 |
| CD300E      | -0.22 | 4.83E-02       | -0.24                 |
| CD86        | -0.44 | 3.06E-05       | -0.34                 |
| CDKN2AIP    | -0.70 | 1.88E-13       | -0.24                 |
| CELFI       | -0.33 | 1.89E-03       | -0.21                 |
| CEP57       | -0.64 | 5.72E-11       | -0.21                 |
| CEP57L1     | -0.42 | 5.60E-05       | -0.21                 |
| CHUK        | -0.40 | 1.58E-04       | -0.38                 |
| CLOCK       | -0.38 | 4.23E-04       | -0.28                 |
| CNIH1       | -0.76 | 9.90E-17       | -0.26                 |
| CNIH4       | -0.55 | 7.62E-08       | -0.25                 |
| COX6B1      | -0.40 | 1.48E-04       | -0.24                 |
| CRBN        | -0.67 | 3.54E-12       | -0.28                 |
| CRCP        | -0.65 | 1.70E-11       | -0.23                 |
| CRK         | -0.23 | 3.37E-02       | -0.24                 |
| CRTAP       | -0.55 | 6.41E-08       | -0.26                 |
| CTDSPL2     | -0.46 | 1.32E-05       | -0.6                  |
| CUZD1       | -0.27 | 1.37E-02       | -0.31                 |
| CXCL8       | -0.23 | 2.90E-02       | -0.28                 |
| CYSLTR1     | -0.37 | 5.34E-04       | -0.23                 |
| DENND2D     | -0.39 | 2.52E-04       | -0.25                 |
| DET1        | -0.34 | 1.56E-03       | -0.22                 |
| DNAJA2      | -0.51 | 7.94E-07       | -0.36                 |
| DNAJB14     | -0.55 | 7.46E-08       | -0.28                 |
| DNAJB9      | -0.56 | 3.87E-08       | -0.31                 |
| DPH3        | -0.55 | 4.49E-08       | -0.77                 |
| DR1         | -0.49 | 2.00E-06       | -0.27                 |

| Gene Symbol | r     | p-value (corr) | Total context++ score |
|-------------|-------|----------------|-----------------------|
| DTWD1       | -0.63 | 1.75E-10       | -0.23                 |
| DUSP22      | -0.51 | 8.99E-07       | -0.46                 |
| DYNC2L1     | -0.44 | 2.27E-05       | -0.53                 |
| E2F6        | -0.36 | 8.02E-04       | -0.65                 |
| ECHDC1      | -0.69 | 3.29E-13       | -0.52                 |
| EFCAB2      | -0.23 | 3.27E-02       | -0.21                 |
| EIF2S2      | -0.64 | 5.31E-11       | -0.41                 |
| ELOVL4      | -0.22 | 4.52E-02       | -0.41                 |
| EMB         | -0.60 | 1.15E-09       | -0.32                 |
| ENY2        | -0.73 | 2.64E-15       | -0.3                  |
| ENY2        | -0.67 | 3.39E-12       | -0.3                  |
| ERCC8       | -0.56 | 4.05E-08       | -0.22                 |
| ERGIC2      | -0.65 | 2.31E-11       | -0.36                 |
| ERO1L       | -0.22 | 4.38E-02       | -0.65                 |
| ETFDH       | -0.46 | 1.35E-05       | -0.32                 |
| ETV3        | -0.25 | 2.23E-02       | -0.34                 |
| EVI2B       | -0.22 | 4.75E-02       | -0.27                 |
| EXOC5       | -0.41 | 1.18E-04       | -0.27                 |
| FAM103A1    | -0.45 | 1.99E-05       | -0.77                 |
| FAM105A     | -0.55 | 4.88E-08       | -0.22                 |
| FAM122A     | -0.35 | 1.11E-03       | -0.48                 |
| FAM206A     | -0.50 | 1.05E-06       | -0.23                 |
| FAM208A     | -0.36 | 8.16E-04       | -0.23                 |
| FAM72C      | -0.30 | 5.21E-03       | -0.33                 |
| FAS         | -0.39 | 2.39E-04       | -0.58                 |
| FAS         | -0.39 | 2.69E-04       | -0.58                 |
| FBXO30      | -0.25 | 1.98E-02       | -0.27                 |
| FKBP3       | -0.72 | 1.19E-14       | -0.38                 |
| FOPNL       | -0.65 | 1.80E-11       | -0.28                 |
| FSD1L       | -0.29 | 8.48E-03       | -0.23                 |
| FUNDC2      | -0.41 | 1.19E-04       | -0.22                 |
| FUT4        | -0.35 | 1.09E-03       | -0.23                 |
| GALNT1      | -0.58 | 7.08E-09       | -0.69                 |
| GALNT12     | -0.27 | 1.14E-02       | -0.24                 |
| GDPD1       | -0.56 | 2.23E-08       | -0.37                 |
| GHITM       | -0.51 | 6.51E-07       | -0.22                 |
| GLRX        | -0.61 | 6.12E-10       | -0.43                 |
| GMNN        | -0.32 | 2.98E-03       | -0.28                 |
| GOLGA7      | -0.36 | 7.15E-04       | -0.36                 |
| GOLT1B      | -0.63 | 1.07E-10       | -0.59                 |
| GPCPD1      | -0.25 | 2.06E-02       | -0.57                 |
| GRAMD3      | -0.24 | 2.70E-02       | -0.23                 |
| GTF2A2      | -0.56 | 3.35E-08       | -0.27                 |
| GTPBP8      | -0.62 | 4.75E-10       | -0.38                 |
| H2AFJ       | -0.59 | 4.94E-09       | -0.21                 |
| HCFC2       | -0.51 | 9.04E-07       | -0.34                 |
| HDX         | -0.23 | 3.49E-02       | -0.56                 |
| HECTD2      | -0.26 | 1.56E-02       | -0.28                 |
| HMGB1       | -0.72 | 1.67E-14       | -0.26                 |
| HMGB1       | -0.68 | 1.43E-12       | -0.26                 |
| HMGB2       | -0.59 | 4.02E-09       | -0.24                 |
| HNRNPC      | -0.56 | 2.64E-08       | -0.25                 |
| HNRNPLL     | -0.32 | 2.65E-03       | -0.34                 |
| HSD17B11    | -0.42 | 6.96E-05       | -0.26                 |
| IFT80       | -0.60 | 2.01E-09       | -0.36                 |
| IGFBP7      | -0.55 | 7.89E-08       | -0.51                 |
| KATNBL1     | -0.28 | 1.02E-02       | -0.43                 |
| KCNE3       | -0.22 | 3.96E-02       | -0.28                 |
| KIAA0391    | -0.52 | 4.38E-07       | -0.46                 |
| KIAA1143    | -0.58 | 8.34E-09       | -0.23                 |
| KIAA1328    | -0.35 | 1.02E-03       | -0.48                 |
| KIAA1715    | -0.45 | 1.53E-05       | -0.21                 |
| LCORL       | -0.31 | 4.08E-03       | -0.33                 |
| LONRF3      | -0.23 | 3.63E-02       | -0.38                 |
| LOXL4       | -0.22 | 4.30E-02       | -0.29                 |
| LYRM2       | -0.54 | 1.42E-07       | -0.24                 |
| LYRM2       | -0.52 | 3.63E-07       | -0.24                 |
| LZIC        | -0.42 | 5.72E-05       | -0.22                 |
| MAP2K6      | -0.31 | 3.58E-03       | -0.33                 |
| MAP4K3      | -0.58 | 5.33E-09       | -0.55                 |
| MAPK6       | -0.61 | 5.36E-10       | -0.51                 |
| MCTS1       | -0.64 | 7.95E-11       | -0.22                 |
| METTL14     | -0.64 | 3.55E-11       | -0.47                 |
| MFF         | -0.66 | 1.11E-11       | -0.41                 |
| MFSD1       | -0.43 | 4.66E-05       | -0.27                 |
| MKKS        | -0.71 | 3.47E-14       | -0.22                 |
| MOB1A       | -0.34 | 1.38E-03       | -0.26                 |
| MOB4        | -0.75 | 2.60E-16       | -0.33                 |
| MRPL17      | -0.59 | 4.66E-09       | -0.24                 |

| Gene Symbol | r     | p-value (corr) | Total context++ score |
|-------------|-------|----------------|-----------------------|
| MRPS11      | -0.33 | 1.90E-03       | -0.22                 |
| MTHFD2      | -0.53 | 2.79E-07       | -0.21                 |
| MTHFD2      | -0.51 | 9.45E-07       | -0.21                 |
| NAA20       | -0.68 | 6.97E-13       | -0.26                 |
| NAA38       | -0.69 | 4.26E-13       | -0.59                 |
| NABP1       | -0.24 | 2.49E-02       | -0.33                 |
| NBN         | -0.25 | 2.21E-02       | -0.3                  |
| NDUFA4      | -0.77 | 1.10E-17       | -0.79                 |
| NECAP2      | -0.50 | 1.37E-06       | -0.27                 |
| NFU1        | -0.70 | 1.05E-13       | -0.3                  |
| NIPAL2      | -0.35 | 1.17E-03       | -0.22                 |
| LONRF3      | -0.23 | 3.63E-02       | -0.38                 |
| LOXL4       | -0.22 | 4.30E-02       | -0.29                 |
| LYRM2       | -0.54 | 1.42E-07       | -0.24                 |
| LYRM2       | -0.52 | 3.63E-07       | -0.24                 |
| LZIC        | -0.42 | 5.72E-05       | -0.22                 |
| MAP2K6      | -0.31 | 3.58E-03       | -0.33                 |
| MAP4K3      | -0.58 | 5.33E-09       | -0.55                 |
| MAPK6       | -0.61 | 5.36E-10       | -0.51                 |
| MCTS1       | -0.64 | 7.95E-11       | -0.22                 |
| METTL14     | -0.64 | 3.55E-11       | -0.47                 |
| MFF         | -0.66 | 1.11E-11       | -0.41                 |
| MFSD1       | -0.43 | 4.66E-05       | -0.27                 |
| MKKS        | -0.71 | 3.47E-14       | -0.22                 |
| MOB1A       | -0.34 | 1.38E-03       | -0.26                 |
| MOB4        | -0.75 | 2.60E-16       | -0.33                 |
| MRPL17      | -0.59 | 4.66E-09       | -0.24                 |

| Gene Symbol | r     | p-value (corr) | Total context++ score |
|-------------|-------|----------------|-----------------------|
| RNFT1       | -0.64 | 5.84E-11       | -0.72                 |
| RPAP3       | -0.38 | 3.00E-04       | -0.26                 |
| RPF1        | -0.68 | 7.03E-13       | -0.21                 |
| RPL34       | -0.79 | 3.61E-19       | -0.58                 |
| RPL38       | -0.60 | 1.14E-09       | -0.29                 |
| RPL9        | -0.78 | 4.84E-18       | -0.23                 |
| RPL9        | -0.76 | 2.52E-17       | -0.23                 |
| RPL9        | -0.76 | 2.95E-17       | -0.23                 |
| RTCA        | -0.61 | 6.77E-10       | -0.4                  |
| RWDD1       | -0.74 | 7.65E-16       | -0.26                 |
| SAP30L      | -0.27 | 1.36E-02       | -0.26                 |
| SCOC        | -0.67 | 5.12E-12       | -0.25                 |
| SELT        | -0.64 | 8.72E-11       | -0.26                 |
| SENP5       | -0.49 | 2.23E-06       | -0.29                 |
| SERF2       | -0.50 | 1.52E-06       | -0.23                 |
| SERF2       | -0.24 | 2.65E-02       | -0.23                 |
| SERPINI1    | -0.31 | 4.50E-03       | -0.32                 |
| SFT2D3      | -0.69 | 5.49E-13       | -0.43                 |
| SKIL        | -0.45 | 1.66E-05       | -0.77                 |
| SKIL        | -0.25 | 2.42E-02       | -0.77                 |
| SLC25A24    | -0.42 | 5.78E-05       | -0.41                 |
| SLC25A40    | -0.45 | 1.95E-05       | -0.38                 |
| SLC30A1     | -0.48 | 4.32E-06       | -0.37                 |
| SLC31A2     | -0.22 | 4.08E-02       | -0.24                 |
| SMDT1       | -0.51 | 6.98E-07       | -0.26                 |
| SMIM8       | -0.30 | 5.60E-03       | -0.32                 |
| SNX16       | -0.53 | 2.91E-07       | -0.4                  |
| SNX6        | -0.55 | 5.86E-08       | -0.38                 |
| SOCS4       | -0.62 | 4.60E-10       | -0.67                 |
| SPCS3       | -0.47 | 5.89E-06       | -0.35                 |
| SREK1IP1    | -0.62 | 3.92E-10       | -0.78                 |
| SRGN        | -0.48 | 3.47E-06       | -0.27                 |
| SRGN        | -0.42 | 7.22E-05       | -0.27                 |
| SRI         | -0.51 | 8.00E-07       | -0.27                 |
| STARD3NL    | -0.61 | 7.33E-10       | -0.36                 |
| STARD4      | -0.44 | 3.50E-05       | -0.42                 |
| SUB1        | -0.71 | 3.11E-14       | -0.54                 |
| SUPT4H1     | -0.37 | 4.63E-04       | -0.22                 |
| SWSAP1      | -0.45 | 1.96E-05       | -0.74                 |
| SWT1        | -0.22 | 4.61E-02       | -0.34                 |
| TAF5        | -0.33 | 1.92E-03       | -0.32                 |
| TAF9B       | -0.59 | 4.26E-09       | -0.34                 |
| TFEC        | -0.54 | 1.14E-07       | -0.25                 |
| TGDS        | -0.64 | 8.60E-11       | -0.41                 |
| THAP2       | -0.57 | 1.33E-08       | -0.22                 |
| THAP9       | -0.32 | 2.61E-03       | -0.5                  |
| TIMM17B     | -0.43 | 5.00E-05       | -0.37                 |
| TMBIM4      | -0.53 | 2.61E-07       | -0.27                 |
| TMED5       | -0.60 | 2.07E-09       | -0.44                 |
| TMED5       | -0.48 | 4.27E-06       | -0.44                 |
| TMEM167A    | -0.59 | 3.56E-09       | -0.62                 |
| TMEM251     | -0.30 | 5.60E-03       | -0.34                 |
| TMEM65      | -0.46 | 1.36E-05       | -0.34                 |
| TMOD2       | -0.43 | 4.51E-05       | -0.36                 |
| TNFSF10     | -0.42 | 6.78E-05       | -0.53                 |
| TNFSF10     | -0.42 | 7.19E-05       | -0.53                 |
| TTC14       | -0.62 | 3.28E-10       | -0.38                 |
| UBE2W       | -0.48 | 4.57E-06       | -0.38                 |
| UBXN4       | -0.54 | 8.80E-08       | -0.21                 |
| UCHL5       | -0.55 | 6.05E-08       | -0.29                 |
| UCHL5       | -0.53 | 1.76E-07       | -0.29                 |
| UFC1        | -0.62 | 4.51E-10       | -0.24                 |
| UFM1        | -0.72 | 1.63E-14       | -0.6                  |
| UFM1        | -0.69 | 3.16E-13       | -0.6                  |
| UGCG        | -0.42 | 5.94E-05       | -0.48                 |
| UQCR10      | -0.62 | 2.98E-10       | -0.37                 |
| UQCRB       | -0.74 | 1.31E-15       | -0.22                 |
| USO1        | -0.43 | 5.28E-05       | -0.22                 |
| USP49       | -0.36 | 6.61E-04       | -0.42                 |
| UTP6        | -0.60 | 1.37E-09       | -0.25                 |
| VPS25       | -0.61 | 5.94E-10       | -0.44                 |
| WDFY2       | -0.42 | 5.74E-05       | -0.28                 |
| WDR41       | -0.42 | 6.10E-05       | -0.57                 |
| YAE1D1      | -0.61 | 5.50E-10       | -0.35                 |
| YAF2        | -0.42 | 6.61E-05       | -0.34                 |
| YIPF1       | -0.22 | 4.09E-02       | -0.47                 |
| YWHAE       | -0.54 | 1.05E-07       | -0.22                 |
| YWHAE       | -0.48 | 4.89E-06       | -0.22                 |
| ZBTB37      | -0.50 | 1.10E-06       | -0.51                 |
| ZBTB5       | -0.23 | 3.34E-02       | -0.33                 |
| ZBTB8OS     | -0.72 | 1.39E-14       | -0.38                 |
| ZBTB8OS     | -0.57 | 1.07E-08       | -0.38                 |

| Gene Symbol | r     | p-value (corr) | Total context score |
|-------------|-------|----------------|---------------------|
| ZCCHC9      | -0.61 | 5.30E-10       | -0.65               |
| ZFAND5      | -0.25 | 2.14E-02       | -0.24               |
| ZNF141      | -0.64 | 7.72E-11       | -0.21               |
| ZNF169      | -0.22 | 4.28E-02       | -0.25               |
| ZNF226      | -0.69 | 3.04E-13       | -0.58               |
| ZNF226      | -0.66 | 6.91E-12       | -0.58               |
| ZNF24       | -0.46 | 8.76E-06       | -0.25               |
| ZNF268      | -0.68 | 8.41E-13       | -0.52               |
| ZNF322      | -0.73 | 2.71E-15       | -0.51               |
| ZNF322      | -0.63 | 1.24E-10       | -0.51               |
| ZNF33A      | -0.24 | 2.94E-02       | -0.24               |
| ZNF347      | -0.36 | 8.82E-04       | -0.24               |
| ZNF354A     | -0.60 | 1.36E-09       | -0.38               |
| ZNF410      | -0.61 | 8.45E-10       | -0.29               |
| ZNF410      | -0.59 | 4.69E-09       | -0.29               |
| ZNF431      | -0.50 | 1.18E-06       | -0.22               |
| ZNF432      | -0.59 | 4.43E-09       | -0.36               |
| ZNF436      | -0.45 | 1.54E-05       | -0.23               |
| ZNF443      | -0.54 | 8.82E-08       | -0.27               |
| ZNF493      | -0.69 | 2.34E-13       | -0.39               |
| ZNF557      | -0.68 | 1.16E-12       | -0.25               |
| ZNF583      | -0.40 | 1.63E-04       | -0.47               |
| ZNF622      | -0.60 | 1.24E-09       | -0.34               |
| ZNF644      | -0.55 | 5.68E-08       | -0.48               |
| ZNF678      | -0.67 | 3.41E-12       | -0.34               |
| ZNF70       | -0.27 | 1.23E-02       | -0.57               |
| ZNF738      | -0.69 | 6.18E-13       | -0.36               |
| ZNF738      | -0.68 | 1.04E-12       | -0.36               |
| ZNF79       | -0.30 | 5.17E-03       | -0.3                |
| ZSWIM5      | -0.27 | 1.39E-02       | -0.4                |
